# Supplementary material for: Characteristics of neonatal hypoxic-ischemic encephalopathy at high altitude and early results of therapeutic hypothermia
Source: Springer Nature journal article supplement (doi:10.1186/s12887-023-04421-3), 2023-12-01
Supplement: MOESM1 [file 26480624]

**Supplemental Table 1.** Comparisons of EEG features among the 3 centers during 72-hour hypothermia and 24-hour rewarming in Multicenter Study

|                             | Degree of background abnormalities |          |          | Seizure time (s) |           |            | Spike/sharp waves (times/h) |                |                   | Delta brushes (times/h) |           |              | ScO2 (%)  |           |
|-----------------------------|------------------------------------|----------|----------|------------------|-----------|------------|-----------------------------|----------------|-------------------|-------------------------|-----------|--------------|-----------|-----------|
|                             | Center 1                           | Center 2 | Center 3 | Center 1         | Center 2  | Center 3   | Center 1                    | Center 2       | Center 3          | Center 1                | Center 2  | Center 3     | Center 1  | Center 2  |
| <b>Time (hours)</b>         |                                    |          |          |                  |           |            |                             |                |                   |                         |           |              |           |           |
| 0-4                         | 1.0±0.7                            | 2.0±1.0  | 1.8±1.0  | 0 (0- 0)         | 0 (0-0)   | 0 (0-0)    | 5.5 (0-86.8)                | 16.5 (0-270.5) | 80 (9.8-266.3)    | 0 (0-20)                | 0 (0-0)   | 0.7 (0-31)   | 69.9±9.3  | 72.5±15.3 |
| 4-8                         | 1.1±0.7                            | 2.1±0.7  | 1.8±1.0  | 0 (0-800)        | 0 (0-0)   | 0 (0-0)    | 8 (0-128.8)                 | 24.7 (0-148.5) | 58.9 (4.3-375)    | 0 (0-131)               | 0 (0-10)  | 1.4 (0-32.8) | 70.2±7.3  | 63.5±7.0  |
| 8-12                        | 1.1±0.7                            | 2.3±0.8  | 1.9±1.1  | 0 (0-0)          | 0 (0-0)   | 0 (0-0)    | 5 (0-113.5)                 | 41.9 (2-155)   | 56.8 (0-255)      | 0 (0-98)                | 0 (0-2.8) | 1.2 (0-62)   | 70.9±9.8  | 62.5±7.2  |
| 12-16                       | 1.1±0.8                            | 2.0±0.9  | 1.9±1.2  | 0 (0-0)          | 0 (0-0)   | 0 (0-0)    | 5.8 (0-158.3)               | 18.5 (0-119.3) | 68.4 (0-410)      | 0 (0-69)                | 0 (0-1.8) | 0.8 (0-48.5) | 69.6±9.8  | 67.8±4.6  |
| 16-20                       | 1.1±0.7                            | 1.8±0.8  | 2.0±1.1  | 0 (0-0)          | 0 (0-685) | 0 (0-0)    | 11.8 (0-116)                | 14.8 (0-160)   | 50 (0-345)        | 0 (0-60.5)              | 0 (0-8)   | 2.3 (0-32)   | 70.5±10.9 | 63.5±5.7  |
| 20-24                       | 1.1±0.7                            | 2.0±0.9  | 1.9±1.1  | 0 (0-0)          | 0 (0-0)   | 0 (0-0)    | 10.3 (0-124)                | 18.3 (0-75)    | 30.5 (3.5-292.5)  | 0 (0-128)               | 0 (0-0)   | 1.5 (0-50)   | 70.8±9.5  | 65.8±5.0  |
| 24-28                       | 1.0±0.8                            | 1.8±0.9  | 2.4±0.7  | 0 (0-0)          | 0 (0-0)   | 0 (0-0)    | 5.5 (0-124.3)               | 21.5 (0-308.8) | 98.1 (1.8-297.5)  | 0 (0-79.8)              | 0 (0-2)   | 0.9 (0-64)   | 70.4±9.8  | 60.6±9.2  |
| 28-32                       | 0.9±0.8                            | 2.0±0.8  | 2.5±0.5  | 0 (0-0)          | 0 (0-580) | 0 (0-0)    | 7 (0-117)                   | 32 (0-550)     | 64.9 (0-222.5)    | 0 (0-150)               | 0 (0-2.3) | 1 (0-42.5)   | 71.6±10.6 | 60±9.3    |
| 32-36                       | 0.9±0.8                            | 1.9±1.0  | 2.3±0.7  | 0 (0-0)          | 0 (0-0)   | 0 (0-0)    | 8 (0-100)                   | 17.5 (0-525)   | 66.6 (6-322.5)    | 0 (0-219)               | 0 (0-0)   | 1.5 (0-90)   | 71.4±10.0 | 59.6±8.8  |
| 36-40                       | 0.9±0.7                            | 1.6±1.2  | 2.4±0.5  | 0 (0-0)          | 0 (0-0)   | 0 (0-0)    | 8.3 (0-100)                 | 18.7 (0-475)   | 80.8 (1.3-222)    | 0 (0-57.5)              | 0 (0-0.5) | 1.3 (0-56.3) | 70.5±10.1 | 61.4±13.0 |
| 40-44                       | 0.9±0.7                            | 1.3±1.2  | 1.9±1.1  | 0 (0-0)          | 0 (0-0)   | 0 (0-0)    | 8.5 (0-140)                 | 23.8 (2.3-440) | 81.6 (0-277.5)    | 0 (0-33)                | 0 (0-1.8) | 0 (0-15)     | 70.6±10.3 | 56.8±5.5  |
| 44-48                       | 1.0±0.7                            | 1.6±1.2  | 1.8±1.0  | 0 (0-0)          | 0 (0-0)   | 0 (0-0)    | 7 (0-123.3)                 | 17.5 (0-526.7) | 71.3 (21-181.3)   | 0 (0-224)               | 0 (0-2.5) | 0 (0-4.5)    | 72.4±11.0 | 53.4±8.3  |
| 48-52                       | 1.3±0.7                            | 1.9±0.9  | 2.0±1.0  | 0 (0-0)          | 0 (0-0)   | 0 (0-840)  | 9.5 (0-111.8)               | 14.1 (0-577.5) | 60 (7-197.5)      | 0 (0-45)                | 0 (0-0)   | 0 (0-7.5)    | 72.2±11.8 | 58±14.8   |
| 52-56                       | 1.3±0.7                            | 1.8±1.2  | 1.9±1.0  | 0 (0-0)          | 0 (0-0)   | 0 (0-1680) | 10.5 (0-118.3)              | 21.6 (0-505)   | 63.8 (4-133.3)    | 0 (0-137.8)             | 0 (0-3.3) | 2.3 (0-12.8) | 70.9±10.9 | 58.6±10.3 |
| 56-60                       | 1.3±0.7                            | 1.9±1.3  | 1.9±1.0  | 0 (0-0)          | 0 (0-0)   | 0 (0-510)  | 16.5 (0-96.3)               | 21.4 (0-525)   | 86.3 (7.8-211.3)  | 0 (0-73.5)              | 0 (0-3.3) | 0.9 (0-20)   | 72.9±10.9 | 52±12.9   |
| 60-64                       | 1.4±0.7                            | 2.2±1.2  | 1.8±1.0  | 0 (0-0)          | 0 (0-0)   | 0 (0-0)    | 12 (0-107.3)                | 26.8 (0-305)   | 51.3 (5.5-262.5)  | 0 (0-77.3)              | 0 (0-3.3) | 0.5 (0-6.5)  | 73.2±9.8  | 61.8±11.5 |
| 64-68                       | 1.3±0.7                            | 2.1±1.0  | 1.8±1.0  | 0 (0-230)        | 0 (0-0)   | 0 (0-0)    | 10.5 (0-68.8)               | 15 (0-114.3)   | 104.9 (6.5-317.5) | 0 (0-20)                | 0 (0-8.8) | 0.3 (0-12.3) | 72.1±11.2 | 55.6±7.5  |
| 68-72                       | 1.4±0.8                            | 2.3±0.8  | 1.8±1.0  | 0 (0-0)          | 0 (0-0)   | 0 (0-0)    | 12.1 (0-79.5)               | 17.4 (0-225)   | 105 (7-500)       | 0 (0-58.8)              | 0 (0-6)   | 0 (0-17.5)   | 72.9±9.3  | 61.8±14.9 |
| 72-76                       | 1.4±0.7                            | 2.1±0.9  | 1.9±0.9  | 0 (0-120)        | 0 (0-0)   | 0 (0-0)    | 18.5 (0-128.5)              | 25 (0-168.8)   | 97.3 (10-480)     | 0 (0-90)                | 0 (0-4.5) | 2.2 (0-5.3)  | 72.6±10.7 | 56.5±23.3 |
| 76-80                       | 1.3±0.6                            | 2.0±0.8  | 2.0±0.9  | 0 (0-168)        | 0 (0-0)   | 0 (0-0)    | 29 (3.3-129.3)              | 50.6 (0-238.8) | 103.1 (16.5-610)  | 0 (0-87.3)              | 0 (0-12)  | 0 (0-6.8)    | 74.2±11.2 | 66.5±26.2 |
| 80-84                       | 1.3±0.7                            | 2.6±0.5  | 1.9±0.9  | 0 (0-0)          | 0 (0-0)   | 0 (0-0)    | 40.1 (1.8-132)              | 73 (0-237.5)   | 99.5 (16-635)     | 0 (0-117.5)             | 0 (0-1)   | 0 (0-39.5)   | 72.2±11.6 | 70±28.3   |
| 84-88                       | 1.4±0.6                            | 2.4±0.7  | 2.0±1.1  | 0 (0-80)         | 0 (0-0)   | 0 (0-0)    | 41.3 (5.7-163)              | 81.8 (0-212.3) | 80.5 (11.3-645)   | 0 (0-120.8)             | 0 (0-4.3) | 0 (0-27.5)   | 77.9±7.7  | 84±10.0   |
| 88-92                       | 1.4±0.7                            | 2.5±0.5  | 1.9±1.1  | 0 (0-0)          | 0 (0-0)   | 0 (0-0)    | 31.5 (7.3-203)              | 98.0 (0-276)   | 73.3 (9.3-563.3)  | 0 (0-88.5)              | 0 (0-5.3) | 1.8 (0-46.8) | 77.9±10.2 | 80.0±6.5  |
| 92-96                       | 1.5±0.6                            | 2.4±0.5  | 1.9±1.1  | 0 (0-0)          | 0 (0-0)   | 0 (0-0)    | 47.3 (8.7-167.5)            | 76.8 (0-465)   | 95 (4-208.7)      | 0 (0-14.3)              | 0 (0-7)   | 3.8 (0-36.3) | 72±13     | 68.5±9.2  |
| <b>Statistical analysis</b> |                                    |          |          |                  |           |            |                             |                |                   |                         |           |              |           |           |
| <b>Center</b>               |                                    |          |          |                  |           |            |                             |                |                   |                         |           |              |           |           |
| Parameter estimate          |                                    | 0.50     |          |                  | -19.50    |            |                             | 117.3          |                   |                         | -84.0     |              |           | 2.73      |
| P value                     |                                    | <0.001   |          |                  | 0.59      |            |                             | <0.001         |                   |                         | 0.65      |              |           | 0.01      |
| <b>Time</b>                 |                                    |          |          |                  |           |            |                             |                |                   |                         |           |              |           |           |
| Parameter estimate          |                                    | -0.002   |          |                  | -0.56     |            |                             | -1.20          |                   |                         | 0.175     |              |           | 0.142     |
| P value                     |                                    | <0.001   |          |                  | 0.32      |            |                             | <0.001         |                   |                         | <0.001    |              |           | <0.001    |
| <b>Time<sup>2</sup></b>     |                                    |          |          |                  |           |            |                             |                |                   |                         |           |              |           |           |
| Parameter estimate          |                                    | 0.0001   |          |                  |           |            |                             | 0.011          |                   |                         |           |              |           | -0.001    |
| P value                     |                                    | 0.01     |          |                  |           |            |                             | <0.001         |                   |                         |           |              |           | <0.001    |

Abbreviation: EEG = Electroencephalography

Center 1 = Qinghai Red Cross Hospital; Center 2 = Qinghai Women and Children's Hospital; Center 3 = Lhasa People's Hospital.
